# Supplementary material for: Seasonal upregulation of fatty acid transporters in flight muscles of migratory white-throated sparrows (Zonotrichia albicollis)
Source: Oxford University Press journal article supplement (doi:10.1242/jeb.031682), 2009-08-28
Supplement: jeb031682-tables1.pdf [file jeb031682-tables1.pdf]

Table S1. Primer sequences used in PCR and RT-PCR with reverse transcribed mRNA isolated from white-throated sparrow pectoral muscle

| Gene/primer name | Sequence (5'–3')               | Product size (bp) | Annealing temperature (°C) |
|------------------|--------------------------------|-------------------|----------------------------|
| CD36 M2F         | GTG TAY ATy TCd CTT CCw CAT TT | 240               | 45°C/7 cycles              |
| CD36 R1R         | CTC ATT wAr CCA mAg wAT AGG    |                   | then 55°C/28 cycles        |
| CD36 F1          | CAA AGA GGw CCw TAY ACn TA     | 510               | 45°C/7 cycles              |
| CD36 M1R         | CT rCA wAT nTC AGA rGA rAA rAA |                   | then 50°C/35 cycles        |
| CD36 1A          | ACA CCT TGA CCG TCC TCA AC     | 750               | 55                         |
| CD36 1B          | TGA AGG CCT CAC AAG AAG GT     |                   |                            |
| CD36 RT1A*       | CAT ACT GGG AAG GCC ACT GT     | 150               | 56                         |
| CD36 RT1B*       | CTG TAT CCG TGC AGA AGC AA     |                   |                            |
| FABPpm 1A        | TTC CAG AGA AGA GCA TCA TCC    | 450               | 56                         |
| FABPpm 1B        | GTC AGT GAT GTG CTG CCA GT     |                   |                            |
| FABPpm RT1A*     | GTG GAA GGA GTT GGC AGC TA     | 150               | 56                         |
| FABPpm RT1B*     | CTC TCC ATA CAG CCC CAT GT     |                   |                            |
| H-FABP 1A        | CCC ACC ACC ATC ATC GAG        | 200               | 56                         |
| H-FABP 1B        | GCC CAT GGT GAG AGT CAG AA     |                   |                            |
| H-FABP RT1A*     | AAG ACC CAG AGC ACC TTC AA     | 130               | 56                         |
| H-FABP RT1B*     | AAC AGC GAT GTC TCC TTC C      |                   |                            |
| β-Actin 2A       | TGC GTG ACA TCA AGG AGA AG     | 380               | 55                         |
| β-Actin 2B       | ACA TCT GCT GGA AGG TGG AC     |                   |                            |
| β-Actin RT1A*    | CCC TGA AGT ACC CCA TTG AA     | 150               | 56                         |
| β-Actin RT1B*    | GGG GTG TTG AAG GTC TCA AA     |                   |                            |
| GAPDH 2A         | GCA GAT GCT GGT GCT GAA TA     | 420               | 55                         |
| GAPDH 2B         | ACA GAC ACG TTA GGG GTT GG     |                   |                            |
| GAPDH RT1A*      | CAG CAA TGC TTC CTG CAC TA     | 150               | 56                         |
| GAPDH RT1B*      | CCT CTG CCA TCT CTC CAA AG     |                   |                            |
| TATAbp 2A        | TGT CCA GAG CAC CAA CAG TC     | 260               | 55                         |
| TATAbp 2B        | TAA CAG CAG CAA AAC GCT TG     |                   |                            |
| TATAbp RT1A*     | AAG CCA CAC AGG GAA CAT CT     | 150               | 56                         |
| TATAbp RT1B*     | GGG CAC GAA GTG CAA TAG TT     |                   |                            |

\*Primers were used for RT-PCR.

Primers are grouped in pairs as they were used. Product size in base pairs (bp) is the predicted amplicon length after PCR. Annealing temperature will vary by primer pair.
